# Supplementary material
Source: PubMed Central journal article supplement (PMC2704976)
Supplement: NIHMS105252-supplement-01.pdf [file NIHMS105252-supplement-01.pdf]

## Supplemental Figures

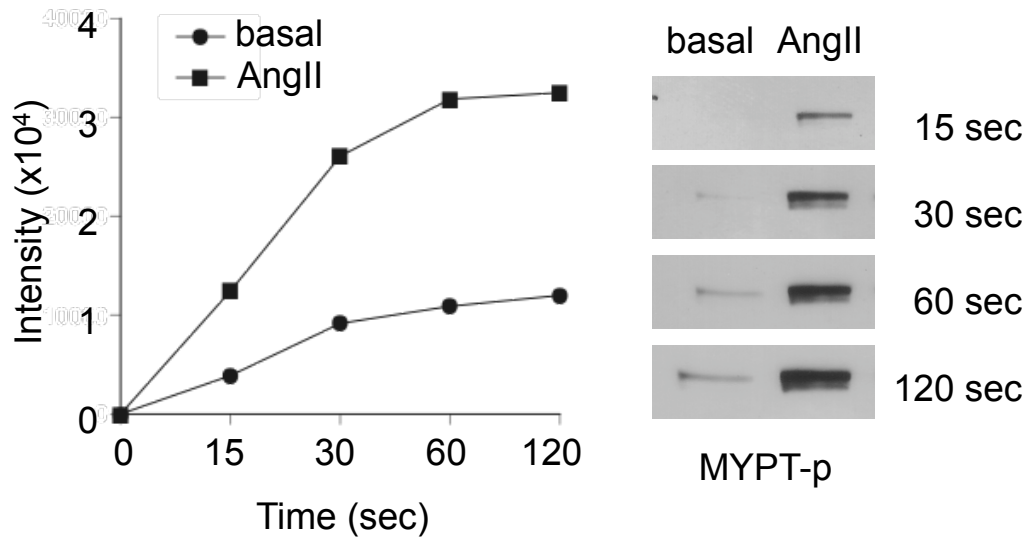

**Figure S1.** VSMCs were stimulated with or without 100 nmol/L AngII for 2 min and the cell lysates were subjected to immunoblot analysis with phospho-Thr<sup>850</sup> MYPT1 antibody with distinct time periods of film exposures. Typical exposure time to develop specific signals is usually between 15-60 seconds in which both the basal and stimulated signal intensities are within a linear range in this example.

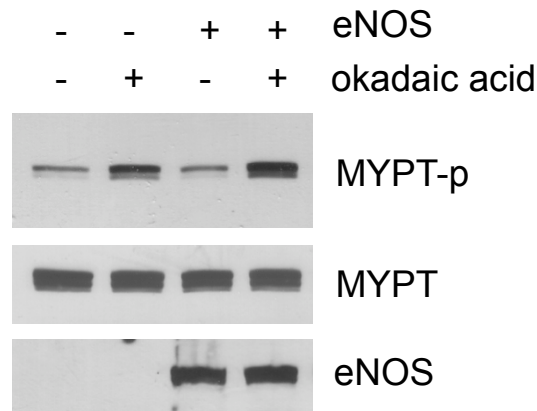

**Figure S2.** VSMCs were infected with adenovirus encoding eNOS or its control vector (20 moi) for 48 h and stimulated with 50 nmol/L okadaic acid for 30 min. Cell lysates were subjected to immunoblot analysis with antibodies as indicated.

Type of file: figure

Label: 1

Filename: Endothelial figure 1.pdf

## Supplemental Figures

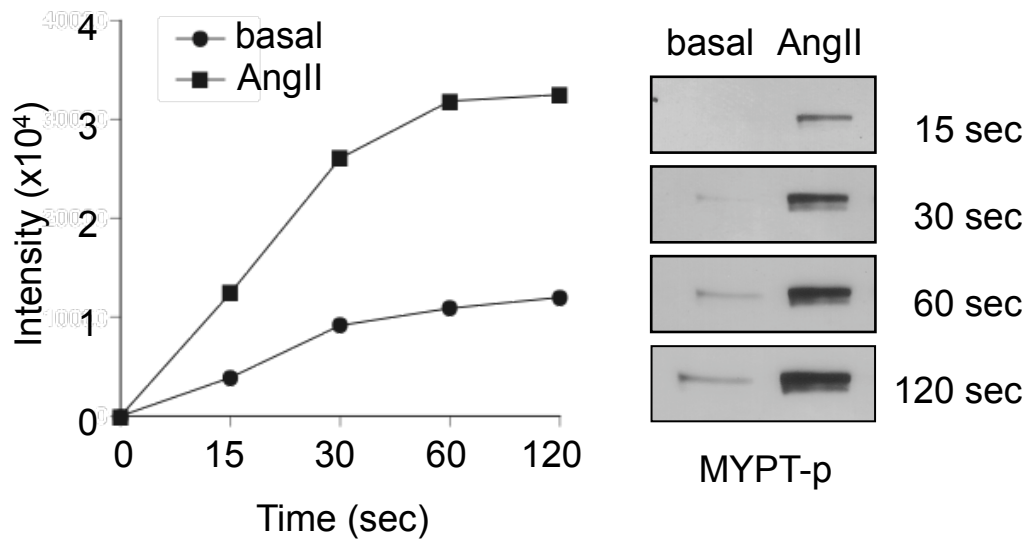

**Figure S1.** VSMCs were stimulated with or without 100 nmol/L AngII for 2 min and the cell lysates were subjected to immunoblot analysis with phospho-Thr<sup>850</sup> MYPT1 antibody with distinct time periods of film exposures. Typical exposure time to develop specific signals is usually between 15-60 seconds in which both the basal and stimulated signal intensities are within a linear range in this example.

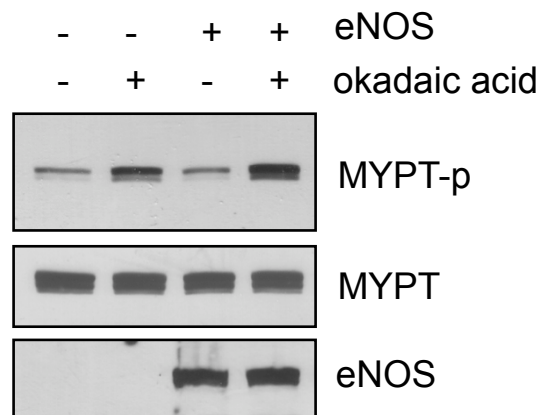

**Figure S2.** VSMCs were infected with adenovirus encoding eNOS or its control vector (20 moi) for 48 h and stimulated with 50 nmol/L okadaic acid for 30 min. Cell lysates were subjected to immunoblot analysis with antibodies as indicated.
